# Supplementary material for: Environmental risks and non-communicable diseases
Source: PubMed Central journal article supplement — BMJ. 2019 Jan 28;364:l265. doi: 10.1136/bmj.l265 (PMC6348403; doi:10.1136/bmj.l265), 2019-01-28
Supplement: neim047952.www1.pdf [file neim047952.www1.pdf]

Supplementary Table 1

Table 1: Examples of interventions to reduce environmental risks to NCDs

| Area/ settings                 | Intervention                                                                                                                                                                                                                                            | Examples and tools                                                                                                                                                                                                                                                                                                                                                                                               |
|--------------------------------|---------------------------------------------------------------------------------------------------------------------------------------------------------------------------------------------------------------------------------------------------------|------------------------------------------------------------------------------------------------------------------------------------------------------------------------------------------------------------------------------------------------------------------------------------------------------------------------------------------------------------------------------------------------------------------|
| <b>Air pollution</b>           |                                                                                                                                                                                                                                                         |                                                                                                                                                                                                                                                                                                                                                                                                                  |
| All areas and relevant sectors | Regulations; policies.                                                                                                                                                                                                                                  | Policies to reduce air pollution, or policies with other objectives but with an effect of reducing air pollution;(1, 2) the Convention on Long-range Transboundary Air Pollution (LRTAP)(3);                                                                                                                                                                                                                     |
| Energy                         | Replacing traditional household polluting fuels (e.g. wood, coal, charcoal, dung, crop residues, kerosene) with clean technology and fuels;<br>In the transition to 'clean' household energy, prioritize the low- emission stoves.                      | Ban on domestic coal burning in Dublin, Ireland; Residential wood burning regulations; (1) Normative guidance of the WHO guidelines for indoor air quality: Household fuel combustion;(4) ISO Standards for Cookstoves (5)                                                                                                                                                                                       |
| Transport                      | Shifting to clean fuel vehicles, cleaner heavy-duty diesel vehicles and low-emission vehicles and fuels, including fuels with reduced sulfur content; traffic charging schemes.                                                                         | Substitution of diesel taxis with hybrid, natural gas and LPG alternatives in Madrid within the Air Quality Plan;(6) Stockholm Congestion Charging Trial;(1) Ban on sulphur-rich fuel in Hong Kong;(7)                                                                                                                                                                                                           |
| Waste                          | Stopping the open burning of waste.                                                                                                                                                                                                                     | Stockholm Convention on Persistent Organic Pollutants; (8) Toolkit for Identification and Quantification of Releases of Dioxins, Furans and Other Unintentional POPs under Article 5 of the Stockholm Convention (9)                                                                                                                                                                                             |
| <b>Workplaces</b>              |                                                                                                                                                                                                                                                         |                                                                                                                                                                                                                                                                                                                                                                                                                  |
| Occupational risks             | Promoting and creating safe and healthy working environments by implementing occupational health measures, including protecting workers from exposure to harmful dusts and fibres, smokes and fumes, carcinogens and allergens and health surveillance. | WHO Global Coordination Mechanism on the Prevention and Control of Noncommunicable Diseases (10) Convention concerning the Protection of Workers against Occupational Hazards in the Working Environment Due to Air Pollution, Noise and Vibration (C148 from 1977) (11) Convention concerning Prevention and Control of Occupational Hazards caused by Carcinogenic Substances and Agents (C139 from 1976) (12) |
| <b>Chemicals</b>               |                                                                                                                                                                                                                                                         |                                                                                                                                                                                                                                                                                                                                                                                                                  |
| Asbestos                       | Regulatory and technical measures for elimination of asbestos-related diseases                                                                                                                                                                          | (13, 14)                                                                                                                                                                                                                                                                                                                                                                                                         |

|                  |                                                                                                                                                                                                                                |                                                                                                                              |
|------------------|--------------------------------------------------------------------------------------------------------------------------------------------------------------------------------------------------------------------------------|------------------------------------------------------------------------------------------------------------------------------|
| Lead             | Eliminating lead paint; preventing lead emissions and exposures from recycling used lead-acid batteries.                                                                                                                       | International lead poisoning prevention week of action (15)<br>Control measures to prevent lead emissions and exposures (16) |
| Mercury          | Controlling mercury emissions and releases, for example from coal fired power plants; phasing out and phasing down of mercury mines and mercury use in products and processes to reduce human exposure.                        | The Minamata Convention on Mercury (17)                                                                                      |
| <b>Radiation</b> |                                                                                                                                                                                                                                |                                                                                                                              |
| UV radiation     | Increasing the provision of shade in public areas, and other measures to reduce ultraviolet (UV) exposure, developing dress codes that are sun-protective for students and workers, and promotion of sun-protective behaviour. | Sun protection policies (18)                                                                                                 |
| Radon            | Establishing building codes (e.g. installation of preventive measures in new homes), establishing national reference levels, ensuring professional competence in prevention and mitigation of radon exposure.                  | WHO Handbook on Indoor Radon: A Public Health Perspective (19)                                                               |

Note: This table presents only an excerpt of the many examples to reduce environmental risks to NCDs; the role of agriculture and food systems has not been directly addressed in this table, although its contributions have been shown.(20)

Additionally, there are many interventions which have proven to significantly reduce air pollution, and this has implications for health. Globally, examples of monitored interventions and other events have produced, in a short and medium term, reductions of air pollutants ranging between 1% and 80%.(21) In China, after the adoption of the 2013-2018 national action plan on air pollution, reduced levels were observed in 74 key cities, with decreases in annual average concentrations of PM<sub>2.5</sub> by 33% , PM10 by 28% , sulphur dioxide by 54%, and carbon monoxide by 28% between 2013 and 2017.(22) Ban of coal burning, systematic inspection, maintenance programs for activities and vehicles, closure of heavily polluting industries, emission control plans, and road charge policies are just few examples of these interventions.

### References to Supplementary Table 1

1. Henschel S, Atkinson R, Zeka A, Le Tertre A, Analitis A, Katsouyanni K, et al. Air pollution interventions and their impact on public health. *International journal of public health*. 2012;57(5):757-68.
2. Correia AW, Pope CA, Dockery DW, Wang Y, Ezzati M, Dominici F. Effect of Air Pollution Control on Life Expectancy in the United States An Analysis of 545 US Counties for the Period from 2000 to 2007. *Epidemiology*. 2013;24(1):23-31.
3. UNECE. 1979 Convention on long-range transboundary air pollution. 1979.
4. WHO. WHO guidelines for indoor air quality: Household fuel combustion. Geneva: WHO; 2014.

5. International Organization for Standardization (ISO). ISO/TC 285 - Clean cookstoves and clean cooking solutions: ISO; 2018 [19 October 2018]. Available from: <https://www.iso.org/committee/4857971/x/catalogue/>.
6. Vedrenne M, Perez J, Lumbreras J, Rodriguez ME. Life cycle assessment as a policy-support tool: The case of taxis in the city of Madrid. *Energy Policy*. 2014;66:185-97.
7. Hedley AJ, Wong CM, Thach TQ, Ma S, Lam TH, Anderson HR. Cardiorespiratory and all-cause mortality after restrictions on sulphur content of fuel in Hong Kong: an intervention study. *Lancet*. 2002;360(9346):1646-52.
8. United Nations, United Nations Environment Programme. Stockholm Convention on persistent organic pollutants (POPs) as amended in 2009 [28 September 2018]. Available from: <http://chm.pops.int/>.
9. UN Environment Programme, Stockholm Convention. Toolkit for Identification and Quantification of Releases of Dioxins, Furans and Other Unintentional POPs under Article 5 of the Stockholm Convention. UNEP; 2013.
10. WHO. Final report and recommendations from the Working Group on ways and means of encouraging Member States and non-State actors to realize the commitment included in paragraph 44 of the Political Declaration of the High-level Meeting of the United Nations General Assembly on the Prevention and Control of Non-communicable Diseases. Global Coordination Mechanism on the Prevention and Control of Noncommunicable Diseases Geneva: WHO; 2018 [30 September 2018]. Available from: [http://www.who.int/global-coordination-mechanism/working-groups/final\\_3\\_1report\\_with\\_annexes\\_6may16.pdf?ua=1](http://www.who.int/global-coordination-mechanism/working-groups/final_3_1report_with_annexes_6may16.pdf?ua=1).
11. ILO. C148 - Working Environment (Air Pollution, Noise and Vibration) Convention, 1977 (No. 148). Geneva: ILO; 1977.
12. ILO. C139 - Occupational Cancer Convention, 1974 (No. 139). Geneva: ILO; 1974.
13. WHO. Chrysotile asbestos. Geneva: WHO; 2014.
14. ILO. C162-Asbestos convention (No. 162). 1989.
15. WHO. International lead poisoning prevention week of action, 21–27 October 2018 Geneva: WHO; 2018 [16 October 2018]. Available from: [http://www.who.int/ipcs/lead\\_campaign/objectives/en/](http://www.who.int/ipcs/lead_campaign/objectives/en/).
16. WHO. Recycling used lead-acid batteries: health considerations. Geneva: WHO; 2017.
17. UN Environment. Minamata Convention on Mercury: UN Environment; 2013 [30 September 2018]. Available from: <http://www.mercuryconvention.org/Convention/Text/tabid/3426/language/en-US/Default.aspx>.
18. Harrison SL, Garzon-Chavez DR, Nikles CJ. Sun protection policies of Australian primary schools in a region of high sun exposure. *Health Educ Res*. 2016;31(3):416-28.
19. WHO. WHO handbook on indoor radon: a public health perspective. Geneva: WHO; 2009.
20. Giannadaki D, Giannakis E, Pozzer A, Lelieveld J. Estimating health and economic benefits of reductions in air pollution from agriculture. *Sci Total Environ*. 2018;622:1304-16.
21. Rich DQ. Accountability studies of air pollution and health effects: lessons learned and recommendations for future natural experiment opportunities. *Environment international*. 2017;100:62-78.
22. Huang J, Pan X, Guo X, Li G. Health impact of China's Air Pollution Prevention and Control Action Plan: an analysis of national air quality monitoring and mortality data. *The Lancet Planetary health*. 2018;2(7):e313-e23.
